# Supplementary material
Source: MDPI journal article supplement (https://www.mdpi.com/2073-4344/10/9/1069)
Supplement: s1 [file s1]

# Visible Light Responsive Strontium Carbonate Catalyst derived from Solvothermal Synthesis

Pornnaphat Wichannananon,<sup>1,2</sup> Thawanrat Kobkeatthawin<sup>2</sup> and Siwaporn Meejoo Smith<sup>2,\*</sup>

<sup>1</sup> Center of Excellence for Innovation in Chemistry, 272 Rama VI Rd., Rajthevi, Bangkok 10400, Thailand

<sup>2</sup> Center of Sustainable Energy and Green Materials and Department of Chemistry, Faculty of Science, Mahidol University, 999 Phuttamonthon Sai 4 Road, Salaya, Nakorn Pathom 73170, Thailand

\* Correspondence: siwaporn.smi@mahidol.edu; Tel.: +66-93593-9449 (S.M.S)

Received: date; Accepted: date; Published: date

## Supplementary Materials

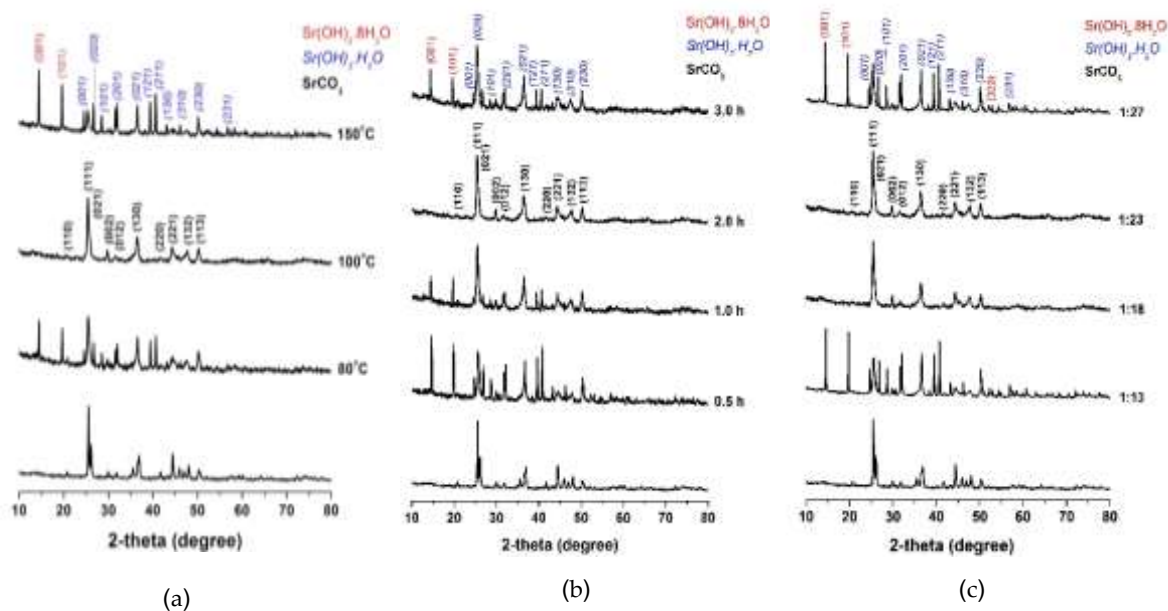

Figure S1: PXRD patterns of Sr containing samples derived from solvothermal treatments of hydrated strontium hydroxide in ethanol (a) at varying solvothermal temperatures, 2 h, Sr:EtOH mole ratios of 1:23 and (b) at varying solvothermal treatment times, 100 °C, Sr:EtOH mole ratios of 1:23

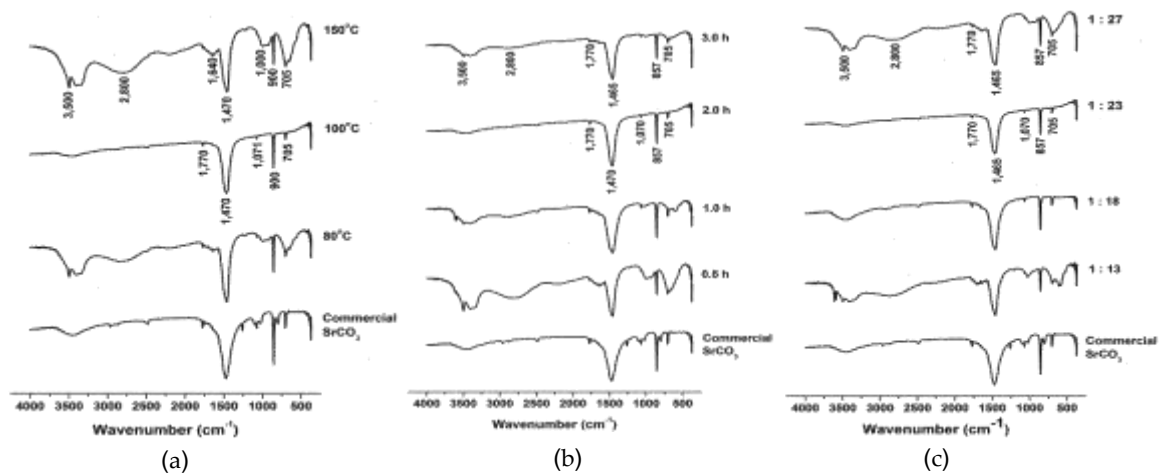

Figure S2: FTIR spectra of Sr containing samples derived from solvothermal treatments of hydrated strontium hydroxide in ethanol (a) at varying solvothermal temperatures, 2 h, Sr:EtOH mole ratios of 1:23 and (b) at varying solvothermal treatment times, 100 °C, Sr:EtOH mole ratios of 1:23.

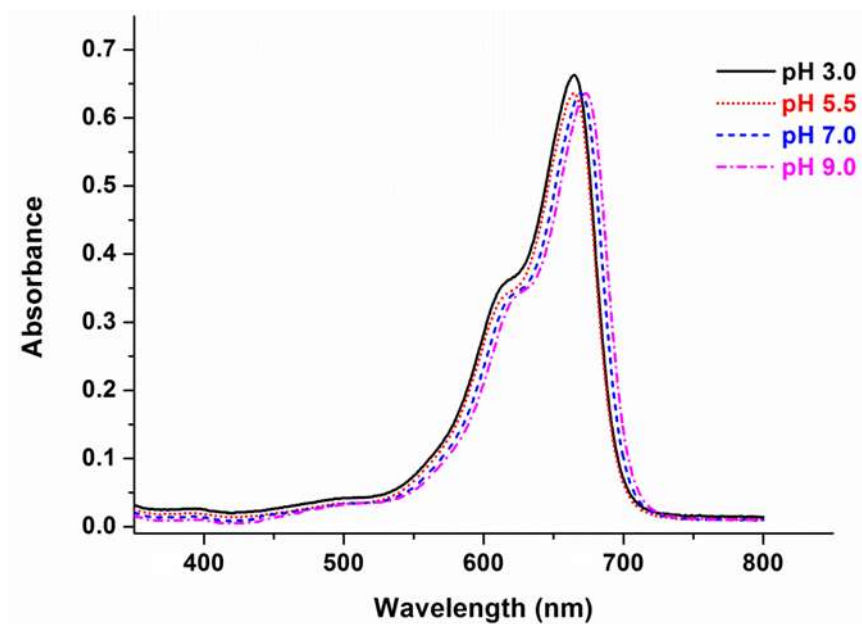

Figure S3: Absorption spectra of 10 ppm MB aqueous solution under various pH, pH 3.0, pH 5.5, pH 7.0, and pH 9.0

Siwaporn Meejoo Smith has joined the Department of Chemistry, Mahidol University since 1997. Her research utilizes materials innovation to understand structure-property relationships allows for the design and synthesis of technological materials having desirable properties for environmental remediation and greener chemical processes. She received **2017** Endeavour Executive Fellowship from Australian government, **2015** L'Oréal Thailand For Women in Science Fellowship Award for Materials Science Research from L'Oréal (Thailand) Ltd., with support from the Thai National Commission for UNESCO, and **2015** Wiley-CST Award for Contribution to Green Chemistry from the Chemical Society of Thailand jointly with John Wiley & Son Inc.
